# Supplementary material
Source: PubMed Central journal article supplement (PMC7534395)
Supplement: NIHMS1627184-supplement-SM.pdf [file NIHMS1627184-supplement-SM.pdf]

## Supplementary Online Content

Siegel SE, Stock W, Johnson RH, et al. Pediatric-inspired treatment regimens for adolescents and young adults with Philadelphia chromosome-negative acute lymphoblastic leukemia: a review. *JAMA Oncol*. Published online February 15, 2018. doi:10.1001/jamaoncol.2017.5305

**eTable.** *ICD-O-3* Histology/Behavior Codes Used for Acute Lymphoblastic Leukemia and Lymphoblastic Lymphoma (ALL/LBL)

This supplementary material has been provided by the authors to give readers additional information about their work.

eTable. ICD-O-3 Histology/Behavior Codes Used for Acute Lymphoblastic Leukemia and Lymphoblastic Lymphoma (ALL/LBL)

---

**ICD-O-3 Histology/Behavior Codes Used for Acute Lymphoblastic Leukemia and Lymphoblastic Lymphoma (ALL/LBL)**

---

*9728-9729*

9728/3: Precursor B-lymphoblastic lymphoma (OBS 2010+) see 9811/3  
9729/3: Precursor T-cell lymphoblastic lymphoma, NOS (OBS 2010+) see 9837/3

---

*9811-9818*

9811/3: B lymphoblastic leukemia/lymphoma, NOS  
9812/3: B lymphoblastic leukemia/lymphoma w/t(9;22)(q34;q11.2); BCR-ABL1  
9813/3: B lymphoblastic leukemia/lymphoma w/t(v;11q23); MLL rearranged  
9814/3: B lymphoblastic leukemia/lymphoma w/t(12;21)(p13;q22); TEL-AML1  
9815/3: B lymphoblastic leukemia/lymphoma w/hyperdiploidy  
9816/3: B lymphoblastic leukemia/lymphoma w/hypodiploidy (hypodiploid ALL)  
9817/3: B lymphoblastic leukemia/lymphoma w/t(5;14)(q31;q32); IL3-IGH  
9818/3: B lymphoblastic leukemia/lymphoma w/t(1;19)(q23;p13.3); E2A PBX1

---

*9827*

9827/3: Adult T-cell leukemia/lymphoma

---

*9831-9837*

9831/3: T-cell large granular lymphocytic leukemia  
9832/3: Prolymphocytic leukemia, NOS  
9833/3: B-cell prolymphocytic leukemia  
9834/3: T-cell prolymphocytic leukemia  
9835/3: Precursor cell lymphoblastic leukemia, NOS (OBS 2010+) see 9811/3  
9836/3: Precursor B-cell lymphoblastic leukemia (OBS 2010+) see 9811/3  
9837/3: T lymphoblastic leukemia/lymphoma

---
